# Supplementary material
Source: publisher site journal article supplement (https://www.dovepress.com/article/304600)
Supplement: Supplementary file 1 [file get_supplementary_file.php]

# Supplementary Materials

Supplementary Table 1. Clinical characteristics of patients

| Parametera | SJC | TJC | DAS28-ESR | Patient global health | HAQ-DI | VAS | Physician global health |
| --- | --- | --- | --- | --- | --- | --- | --- |
| **Baseline (Week 0)** | | | | | | | |
| Mean | 9.66 | 13.51 | 40.31 | 68.04 | 1.68 | 63.95 | 61.56 |
| Shape | 7.90 | 10.73 | 31.14 | 64.07 | 1.53 | 58.50 | 57.74 |
| Scale | 1.22 | 1.26 | 1.29 | 1.06 | 1.10 | 1.09 | 1.07 |
| **Baseline (Week 12; RCI)** | | | | | | | |
| Mean | 0.91 | 1.42 | 15.84 | 19.94 | 0.69 | 18.77 | 12.91 |
| Shape | 0.12 | 0.47 | 12.32 | 11.85 | 0.42 | 17.24 | 7.43 |
| Scale | 7.76 | 2.99 | 1.29 | 1.68 | 1.64 | 1.09 | 1.74 |
| **Baseline (Week 24; RCI)** | | | | | | | |
| Mean | 1.53 | 2.40 | 23.13 | 22.09 | 0.84 | 21.27 | 15.19 |
| Shape | 0.05 | 0.05 | 13.99 | 8.11 | 0.46 | 6.91 | 3.82 |
| Scale | 33.54 | 45.38 | 1.65 | 2.72 | 1.82 | 3.08 | 3.98 |
| **Baseline (Week 16; SoC)b** | | | | | | | |
| Mean | 1.74 | 2.64 | 19.60 | 21.88 | 0.77 | 17.21 | 15.46 |
| Shape | 0.04 | 0.35 | 13.12 | 11.18 | 0.31 | 7.87 | 4.91 |
| Scale | 46.99 | 7.65 | 1.49 | 1.96 | 2.51 | 2.19 | 3.15 |

**Abbreviations:** DAS28-ESR, 28-count disease activity score erythrocyte sedimentation rate; HAQ-DI, Health Assessment Questionnaire Disability Index; RCI, repository corticotropin injection; SJC, swollen joint count; SoC, standard of care; TJC, tender joint count; VAS, visual analog scale

**Source**: Phase 4 clinical trial (ClinicalTrials.gov registration NCT02919761)

aShape and scale were derived from generalized linear models with gamma distribution and log-link conducted in Stata v16.0

bDistributions from week 16 of the placebo arm were used to simulate scores for patients who stop taking RCI after achieving target DAS28-ESR score

Supplementary Table 2. Breakdown of costs for base case results

| **Treatment** | **2 years** | | **3 years** | |
| --- | --- | --- | --- | --- |
| **RCI** | **SoC** | **RCI** | **SoC** |
| Total costs | $330,662 | $213,219 | $408,413 | $303,907 |
| Treatment costs | $216,953 | - | $250,164 | - |
| Medication costsa | $3,338 | $20,570 | $4,592 | $29,282 |
| Direct costs | $43,095 | $58,851 | $61,019 | $84,178 |
| Indirect costs | $67,276 | $133,798 | $92,637 | $190,446 |

**Abbreviations:** RCI, repository corticotropin injection; SoC, standard of care

aThese are medication costs related to non-biologic and biologic DMARDs

Supplementary Table 3. Parameters for probabilistic sensitivity analysis

| Parameter | Standard deviation | Distribution | Shape | Scale |
| --- | --- | --- | --- | --- |
| **Medication cost** |  |  |  |  |
| DMARDs | 139 | Gamma | 400 | 6.94 |
| Biologics | 1,331 | Gamma | 400 | 66.5 |
| Corticosteroids | 19.6 | Gamma | 400 | 0.98 |
| **RA-related costs** | See Supplementary Table 4 | | | |
| **Surgery** |  |  |  |  |
| Rate of total joint replacement | 2.87E-03 | Beta | 3,286 | 0.03 |
| Cost of surgery | 2,261 | Gamma | 113 | 46,730 |
| **Pain-related costs** |  |  |  |  |
| Mild pain (VAS ≤ 3.5) | 478 | Gamma | 23.9 | 9,094 |
| Moderate pain (3.5 < VAS < 7.5) | 681 | Gamma | 34.1 | 14,632 |
| Severe pain (VAS ≥ 7.5) | 618 | Gamma | 30.9 | 11,356 |
| **Opioid abuse** |  |  |  |  |
| % opioid abuse (moderate pain) | 6.24E-03 | Beta | 1,409 | 0.06 |
| % opioid abuse (severe pain) | 1.03E-02 | Beta | 784 | 0.08 |
| Cost of opioid abuse | 1,425 | Gamma | 71.3 | 27,563 |
| **Indirect costs** |  | | | |
| % absenteeism, % presenteeism, and % activity impairment | See Supplementary Table 5 | | | |
| U.S. average annual salary | 2,751 | Gamma | 138 | 54,167 |
| Annual cost of caregiving | 221 | Gamma | 11.0 | 4,398 |
| Cost of work-related training | 1,118 | Gamma | 55.9 | 19,859 |
| **Utilities** |  |  |  |  |
| *RA-related utilities* |  |  |  |  |
| HAQ-DI < 0.60 | 0.17 | Beta | 0.36 | 0.89 |
| 0.60 ≤ HAQ-DI ≤ 1.09 | 0.15 | Beta | 2.02 | 0.91 |
| 1.10 ≤ HAQ-DI ≤ 1.59 | 0.12 | Beta | 5.44 | 0.73 |
| 1.60 ≤ HAQ-DI ≤ 2.09 | 0.08 | Beta | 19.4 | 0.23 |
| HAQ-DI ≥ 2.1 | 0.03 | Beta | 100 | 0.19 |
| *Pain-related utilities* |  |  |  |  |
| Mild pain (VAS ≤ 3.5) | 0.15 | Beta | 2.02 | 0.40 |
| Moderate pain (3.5<VAS<7.5) | 0.10 | Beta | 11.3 | 0.53 |
| Severe pain (VAS ≥ 7.5) | 0.10 | Beta | 13.6 | 0.48 |

**Abbreviations:** DMARD, disease-modifying anti-rheumatic drugs; HAQ-DI, Health Assessment Questionnaire Disability Index; RA, rheumatoid arthritis; US, United States; VAS, visual analog scale

Supplementary Table 4. Sensitivity analysis parameters for RA-related costs

| Parameter | HAQ-DI score | | | | |
| --- | --- | --- | --- | --- | --- |
| **<0.60** | **0.60 to 1.09** | **1.10 to 1.59** | **1.60 to 2.09** | **≥2.10** |
| **Standard deviation** |  |  |  |  |  |
| RA-related hospitalization | $306 | $400 | $423 | $436 | $512 |
| Outpatient costs | $22 | $29 | $30 | $31 | $37 |
| Primary care and specialist visits | $28 | $32 | $28 | $32 | $39 |
| Rehabilitation | $4 | $5 | $8 | $11 | $11 |
| Laboratory testing and imaging | $15 | $11 | $16 | $18 | $40 |
| **Shape** |  |  |  |  |  |
| RA-related hospitalization | 400 | 400 | 400 | 400 | 400 |
| Outpatient costs | 400 | 400 | 400 | 400 | 400 |
| Primary care and specialist visits | 400 | 400 | 400 | 400 | 400 |
| Rehabilitation | 400 | 400 | 400 | 400 | 400 |
| Laboratory testing and imaging | 400 | 400 | 400 | 400 | 400 |
| **Scale** |  |  |  |  |  |
| RA-related hospitalization | 15.284 | 20.022 | 21.137 | 21.782 | 25.604 |
| Outpatient costs | 1.095 | 1.435 | 1.515 | 1.561 | 1.835 |
| Primary care and specialist visits | 1.397 | 1.579 | 1.425 | 1.604 | 1.942 |
| Rehabilitation | 0.197 | 0.267 | 0.415 | 0.531 | 0.570 |
| Laboratory testing and imaging | 0.746 | 0.573 | 0.816 | 0.883 | 2.016 |

**Abbreviations:** HAQ-DI, Health Assessment Questionnaire Disability Index; RA, rheumatoid arthritis

Supplementary Table 5. Sensitivity analysis parameters for indirect costs

| Parameter | DAS28-ESR | | | |
| --- | --- | --- | --- | --- |
| **< 2.6** | **≥2.6 to < 3.2** | **≥3.2 to ≤ 5.1** | **> 5.1** |
| **Standard deviation** |  |  |  |  |
| % absenteeism | 0.0059 | 0.0065 | 0.0075 | 0.0133 |
| % presenteeism | 0.0045 | 0.0111 | 0.0140 | 0.0271 |
| % activity impairment | 0.0086 | 0.0139 | 0.0226 | 0.0325 |
| **Shape** |  |  |  |  |
| % absenteeism | 353.02 | 347.64 | 340.23 | 293.38 |
| % presenteeism | 363.55 | 311.08 | 287.72 | 182.31 |
| % activity impairment | 330.89 | 288.22 | 218.75 | 139.01 |
| **Scale** |  |  |  |  |
| % absenteeism | 2,660.16 | 2,314.64 | 1,942.26 | 810.09 |
| % presenteeism | 3,635.45 | 1,091.84 | 739.85 | 153.53 |
| % activity impairment | 1,589.10 | 745.70 | 265.21 | 74.57 |

**Abbreviations:** DAS28-ESR, 28-Joint Disease Activity Score with Erythrocyte Sedimentation Rate
